# Supplementary material for: A novel MOF-808 derived material for oxidative desulfurization: the synergistic effect of hydrophobicity and electron transfer
Source: Royal Society of Chemistry journal article supplement (doi:10.1039/d4dt01256a), 2024-01-01
Supplement: d4dt01256a1.pdf [file d4dt01256a1.pdf]

# Supplementary Information of

## **A novel MOF-808 derived material for oxidative desulfurization: the synergistic effect of hydrophobicity and electron transfer**

Chengzhao Zhu<sup>1</sup>, Miaomiao Zheng<sup>1</sup>, Mingyu Liao<sup>1</sup>, Nan Jiang<sup>1</sup>, Yuanjie Xiao<sup>1</sup>,  
Jianbin Liu<sup>1</sup>, Linfeng Zhang<sup>1</sup>, Jia Guo<sup>1</sup>, Huadong Wu<sup>1,\*</sup>, Hao Yan<sup>2,\*</sup>

<sup>1</sup> *Key Laboratory of Green Chemical Process of Ministry of Education, Engineering Research Centre of Phosphorus Resources Development and Utilization of Ministry of Education, Hubei Key Laboratory of Novel Chemical Reactor and Green Chemical Technology, Wuhan Institute of Technology, Wuhan 430073, P. R. China.*

<sup>2</sup> *Army Logistics Academy, Chongqing 401331, PR China.*

\* *Corresponding author: Tel: 86-027-87194883;*

*E-mail address: wuhuadong@wit.edu.cn.*

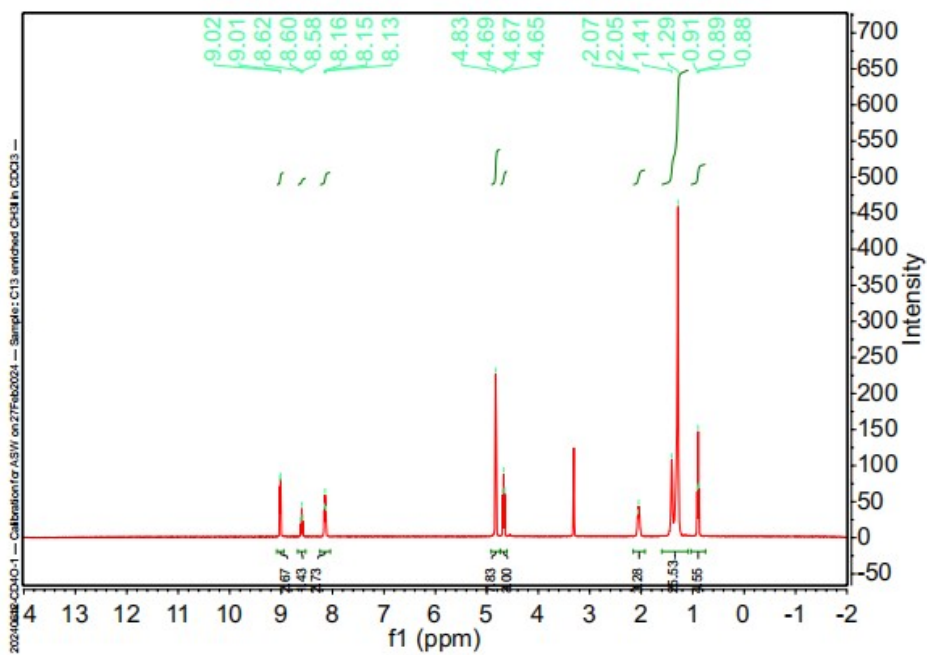

Figure S1.  $^1\text{H}$  NMR spectrum of  $[\text{C}_{12}\text{Py}]_3(\text{NH}_4)_3\text{Mo}_7\text{O}_{24}$  in  $\text{CD}_4\text{O}$ .

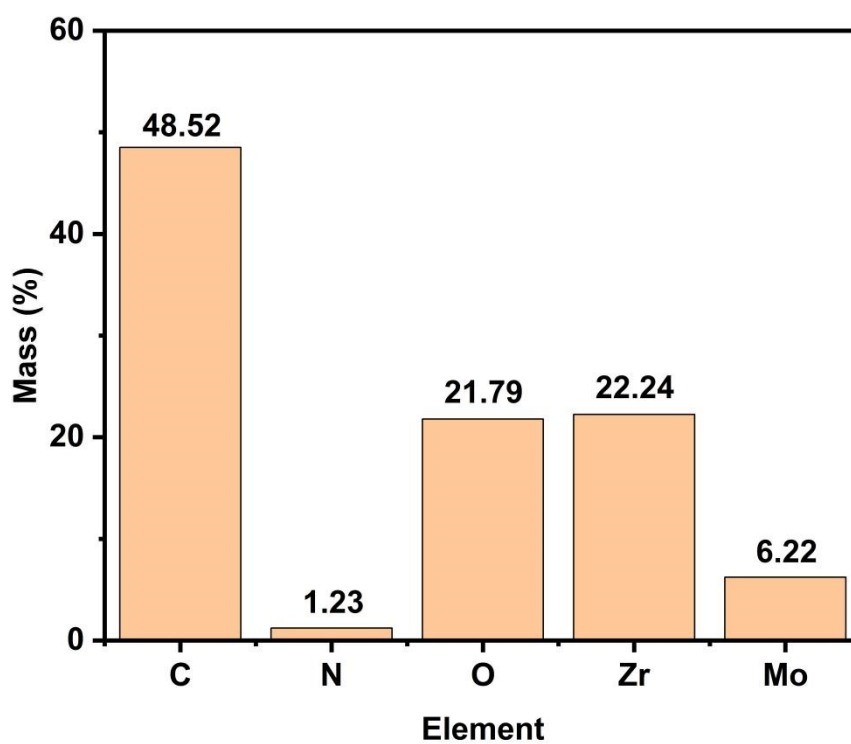

Figure S2. Quality percentage of different elements over  $C_{12}Py]_3(NH_4)_3Mo_7O_{24}/T-MOF-808-15\%$ .

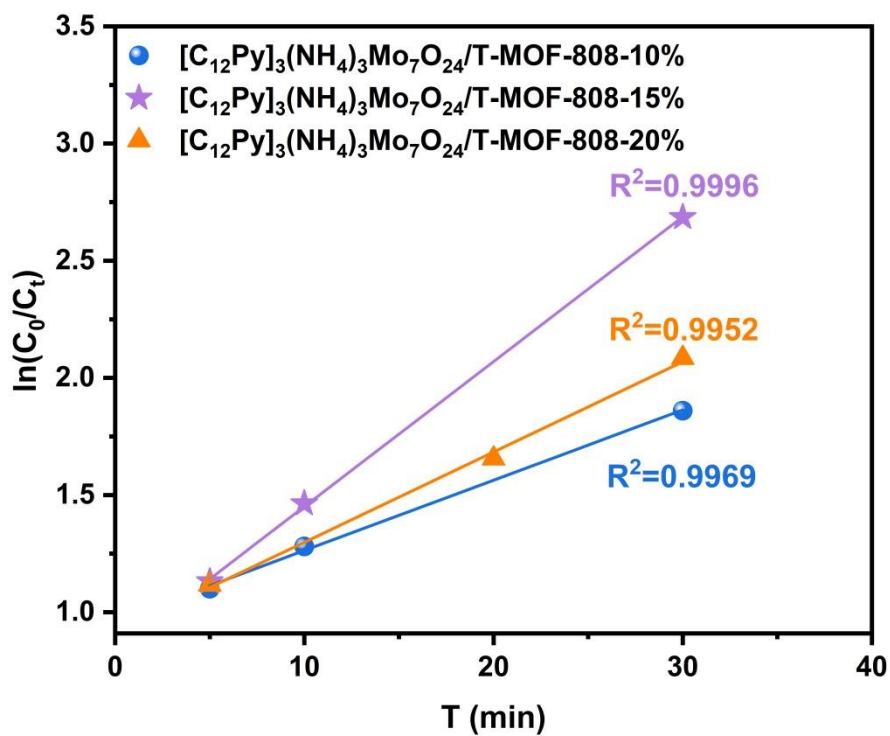

Figure S3. Pseudo-first-order kinetics for the oxidation of DBT at different loading amounts over  $[\text{C}_{12}\text{Py}]_3(\text{NH}_4)_3\text{Mo}_7\text{O}_{24}/\text{T-MOF-808}$ .

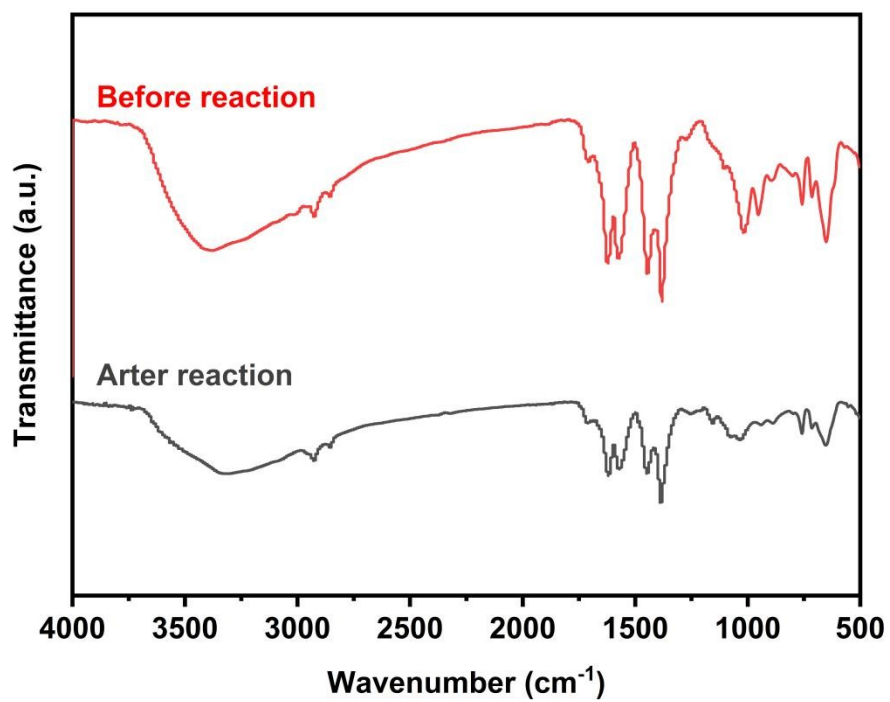

Figure S4. FT-IR spectra of  $[\text{C}_{12}\text{Py}]_3(\text{NH}_4)_3\text{Mo}_7\text{O}_{24}/\text{T-MOF-808-15\%}$  catalyst before and after reaction.

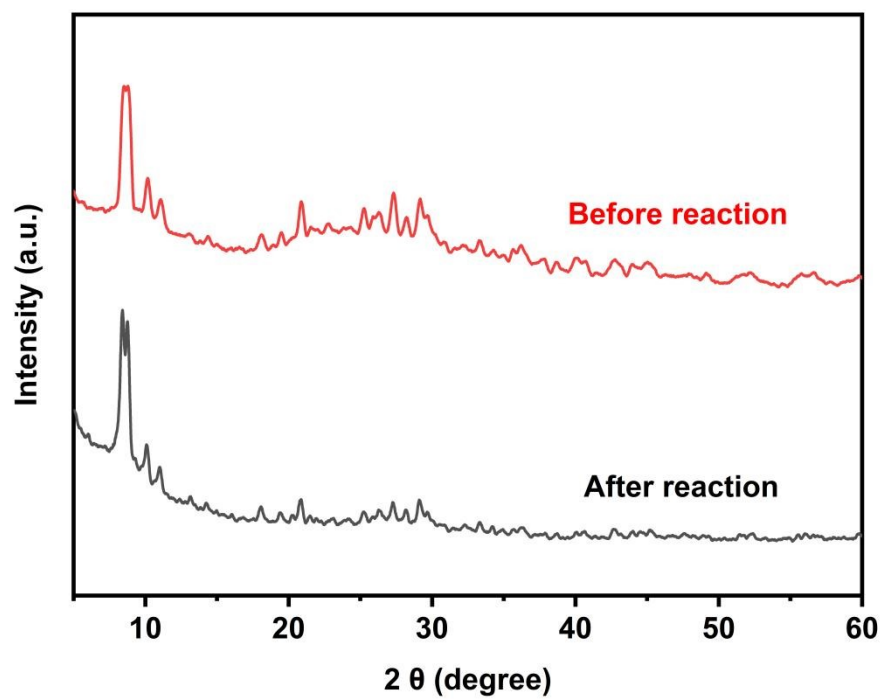

Figure S5. XRD patterns of  $[\text{C}_{12}\text{Py}]_3(\text{NH}_4)_3\text{Mo}_7\text{O}_{24}/\text{T-MOF-808-15\%}$  catalyst before and after reaction.

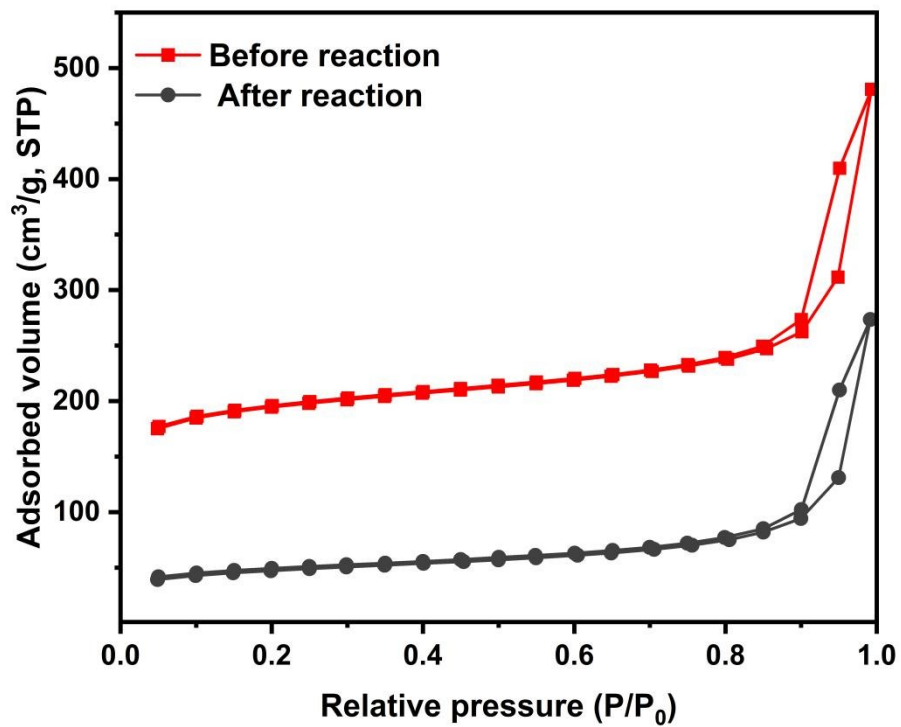

Figure S6.  $N_2$  adsorption-desorption isotherms of  $[C_{12}Py]_3(NH_4)_3Mo_7O_{24}/T-MOF-808$  before and after reaction.

**Table S1. Textural properties of different samples.**

| Samples                                                                                                          | BET surface area (m <sup>2</sup> /g) | Pore Volume (cm <sup>3</sup> /g) | Pore Diameter (nm) |
|------------------------------------------------------------------------------------------------------------------|--------------------------------------|----------------------------------|--------------------|
| MOF-808                                                                                                          | 924.78                               | 0.81                             | 3.05               |
| T-MOF-808                                                                                                        | 899.89                               | 0.74                             | 3.06               |
| [C <sub>12</sub> Py] <sub>3</sub> (NH <sub>4</sub> ) <sub>3</sub> Mo <sub>7</sub> O <sub>24</sub> /T-MOF-808-10% | 687.21                               | 0.65                             | 17.45              |
| [C <sub>12</sub> Py] <sub>3</sub> (NH <sub>4</sub> ) <sub>3</sub> Mo <sub>7</sub> O <sub>24</sub> /T-MOF-808-15% | 497.83                               | 0.63                             | 30.99              |
| [C <sub>12</sub> Py] <sub>3</sub> (NH <sub>4</sub> ) <sub>3</sub> Mo <sub>7</sub> O <sub>24</sub> /T-MOF-808-20% | 205.77                               | 0.31                             | 17.35              |

**Table S2. Reaction rate constant corresponding to different loadings in the ODS reaction.**

| Load capacity (%) | Rate constant <i>k</i> (min <sup>-1</sup> ) | Correlation factor R <sup>2</sup> |
|-------------------|---------------------------------------------|-----------------------------------|
| 10                | 0.02999                                     | 0.9969                            |
| 15                | 0.06185                                     | 0.9996                            |
| 20                | 0.03851                                     | 0.09952                           |



**Table S3. Comparison of the ODS performances of different catalysts for DBT**

| Entry | catalysts                                                                                 | Sulfur<br>( $\mu\text{g}\cdot\text{g}^{-1}$ ) | Dosage<br>(mg) | T<br>( $^{\circ}\text{C}$ ) | O/S | t<br>(min) | Conversi<br>on rate<br>(%) | Ref.         |
|-------|-------------------------------------------------------------------------------------------|-----------------------------------------------|----------------|-----------------------------|-----|------------|----------------------------|--------------|
| 1     | UIO-66                                                                                    | 500                                           | 100            | 60                          | 12  | 150        | 100                        | [1]          |
| 2     | $\text{PMo}_{11}/\text{g-C}_3\text{N}_4$                                                  | 100                                           | 100            | 30                          | 10  | 20         | 98.6                       | [2]          |
| 3     | UiO-66(Zr)-free                                                                           | 1000                                          | 50             | 60                          | 6   | 120        | 99.6                       | [3]          |
| 4     | $\text{Ti}_{32}$ -BTA                                                                     | 200                                           | 50             | 60                          | 6   | 60         | 100                        | [4]          |
| 5     | $\text{PW}_{12}@/\text{TiO}_2$                                                            | 500                                           | 85             | 60                          | 6   | 60         | 99.9                       | [5]          |
| 6     | $[\text{C}_{12}\text{Py}]_3(\text{NH}_4)_3\text{Mo}_7\text{O}_{24}/\text{T-MOF-808-15\%}$ | 500                                           | 100            | 60                          | 6   | 40         | 100                        | This<br>work |

## References

- [1] X. Zhang, P. Huang, A. Liu, M. Zhu, A metal-organic framework for oxidative desulfurization: UIO-66(Zr) as a catalyst, *Fuel* 209 (2017) 417-423.
- [2] B. Moeinifard, A. Najafi Chermahini, Mono lacunary phosphomolybdate supported on mesoporous graphitic carbon nitride: An eco-friendly and efficient catalyst for oxidative desulfurization of the model and real fuels, *J. Environ. Chem. Eng.* 9 (4) (2021) 105430.
- [3] G. Ye, D. Zhang, X. Li, K. Leng, W. Zhang, J. Ma, Y. Sun, W. Xu, S. Ma, Boosting Catalytic Performance of Metal-Organic Framework by Increasing the Defects via a Facile and Green Approach, *ACS Appl. Mater. Interfaces* 9 (40) (2017) 34937-34943.
- [4] H.-T. Lv, Y. Cui, G.-D. Zou, N. Li, P. Yang, Y. Fan, Synthesis of titanium-oxo macrocycles and their catalytic properties for oxidative desulfurization, *Dalton Trans.* 48 (37) (2019) 14044-14048.

- [5] H. Gao, X. Wu, D. Sun, G. Niu, J. Guan, X. Meng, C. Liu, W. Xia, X. Song, Preparation of core-shell PW12@TiO<sub>2</sub> microspheres and oxidative desulfurization performance, *Dalton Trans.* 48 (17) (2019) 5749-5755.
